# Supplementary material for: A facile growth process of highly single crystalline Ir1−xVxO2 mixed metal oxide nanorods and their electrochemical properties
Source: Royal Society of Chemistry journal article supplement (doi:10.1039/c7ce00637c), 2017-01-01
Supplement: c7ce00637c1.pdf [file c7ce00637c1.pdf]

## Electronic Supporting Information (ESI)

### **A facile growth process of highly single crystalline $\text{Ir}_{1-x}\text{V}_x\text{O}_2$ mixed metal oxide nanorods and their electrochemical properties**

Sung Hee Chun<sup>a,d</sup>, Hyun Yeong Kim<sup>a,d</sup>, Hyesu Jang<sup>a</sup>, Yejung Lee<sup>a</sup>, Ara Jo<sup>a</sup>, Nam-Suk Lee<sup>b</sup>,  
Hak Ki Yu<sup>c</sup>, Youngmi Lee<sup>a</sup>, Myung Hwa Kim<sup>a\*</sup>, and Chongmok Lee<sup>a\*</sup>

<sup>a</sup>*Department of Chemistry & Nano Science, Ewha Womans University, Seoul, 03760, Korea*

<sup>b</sup>*National Institute for Nanomaterials Technology (NINT), Pohang University of Science and Technology (POSTECH), Pohang, 790-784, Korea*

<sup>c</sup>*Department of Materials Science and Engineering and Department of Energy Systems Research, Ajou University, Suwon, 443-749, Korea*

<sup>d</sup>*Authors are equally contributed to this work.*

\*To whom all correspondence should be addressed: [myungkim@ewha.ac.kr](mailto:myungkim@ewha.ac.kr), [cmlee@ewha.ac.kr](mailto:cmlee@ewha.ac.kr)

**Fig S1**

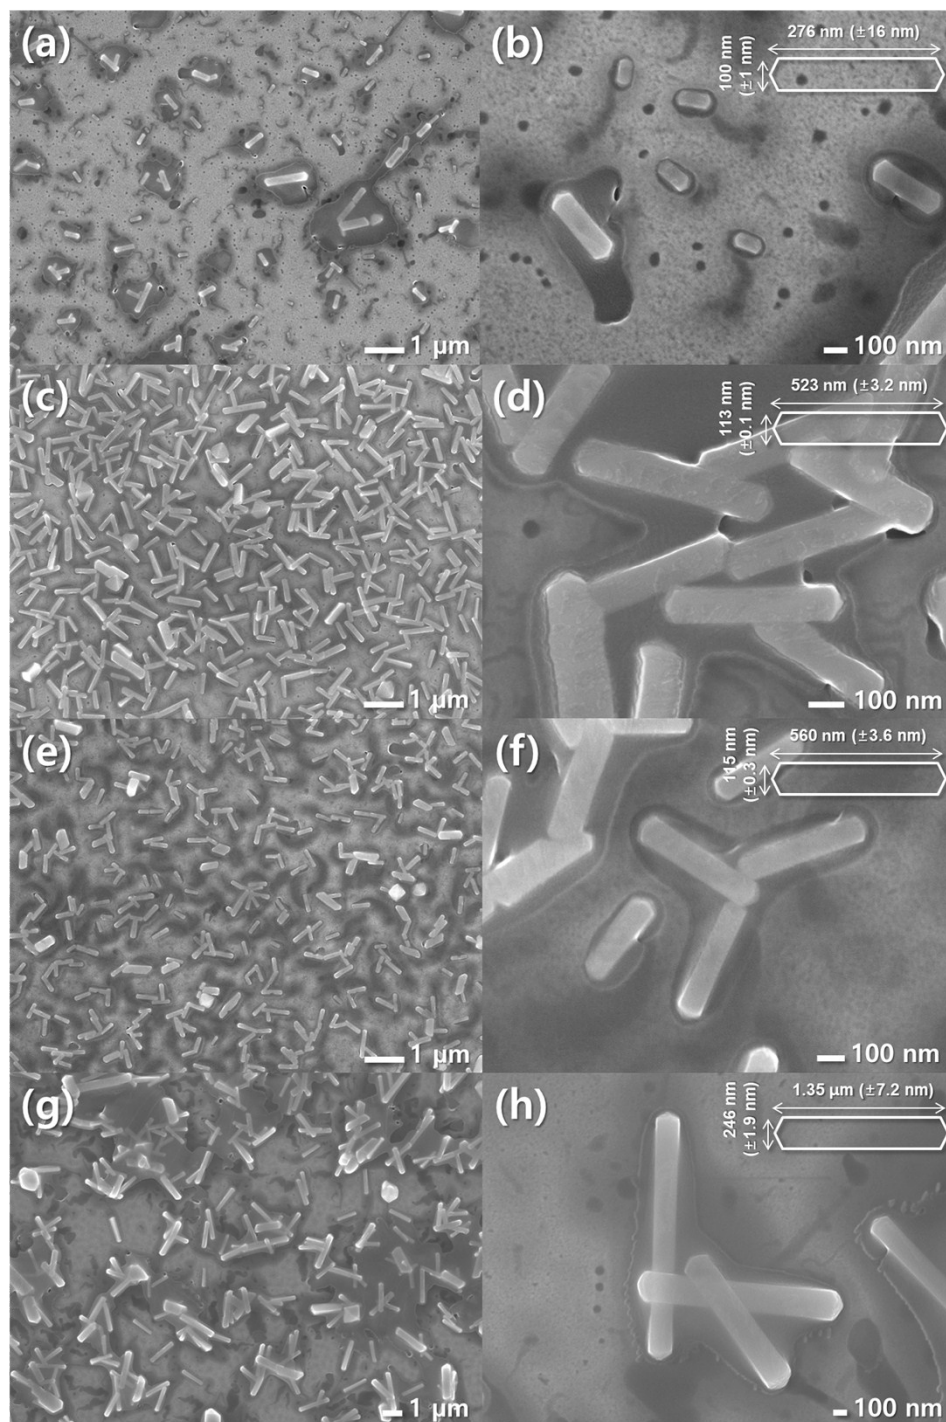

**Fig. S1** SEM images for the time dependence of the growth process of  $\text{Ir}_{0.34}\text{V}_{0.66}\text{O}_2$  mixed oxide nanorods. (a) and (b) for 10 min, (c) and (d) for 30 min, (e) and (f) for 1 hour, (g) and (h) for 1.5 hour, respectively.

**Fig. S2**

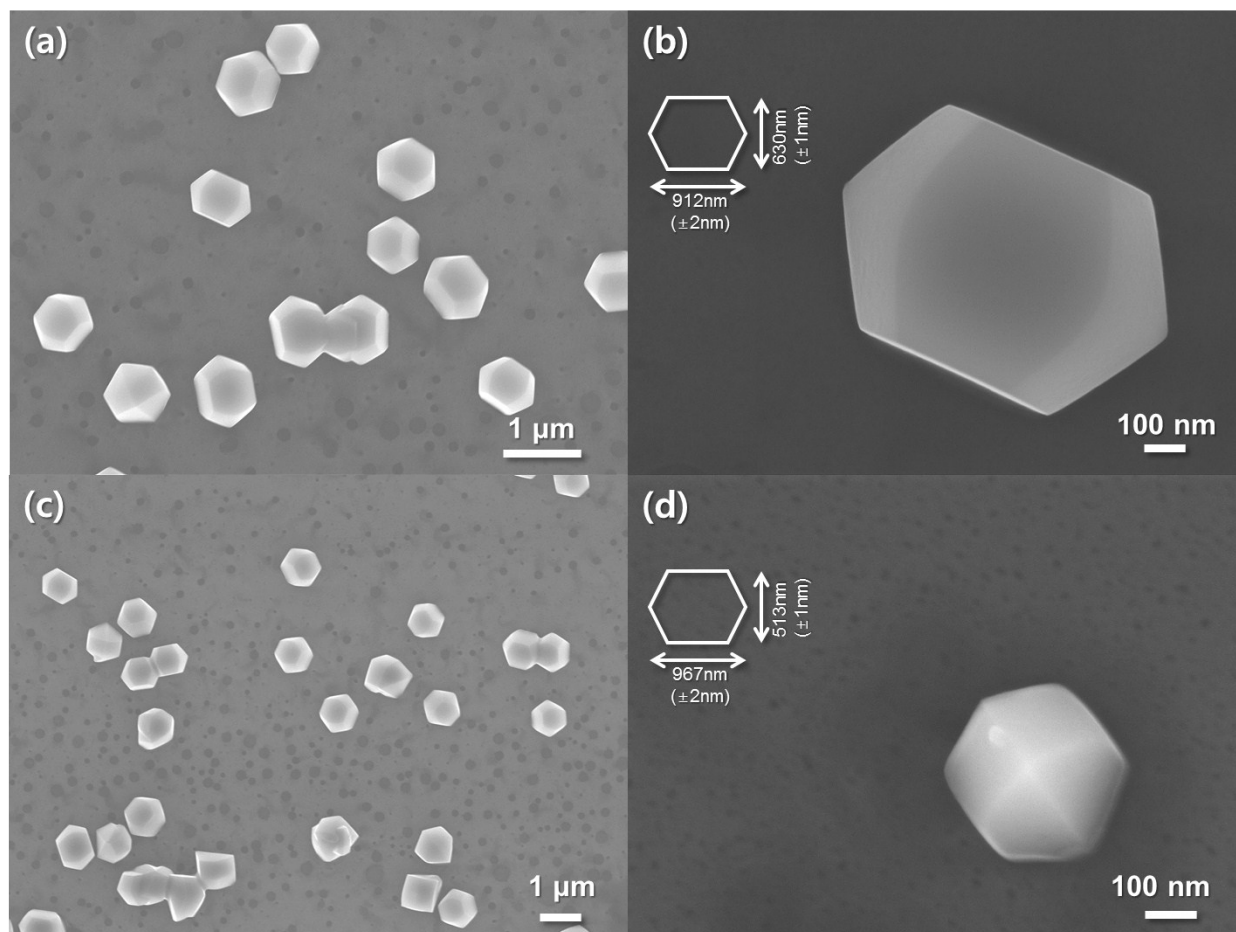

**Fig. S2** SEM images for the time dependence of the growth process of  $\text{Ir}_{0.87}\text{V}_{0.13}\text{O}_2$  mixed oxide nanorods. (a) and (b) for 1 h, (c) and (d) for 3hrs, respectively.

**Fig. S3**

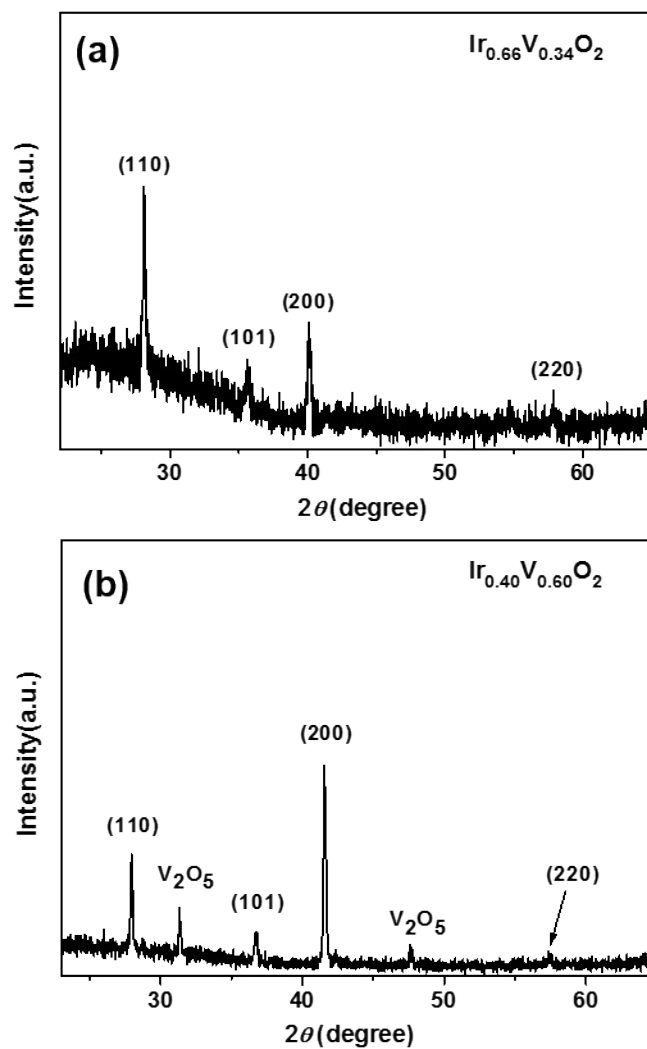

**Fig. S3** X-ray diffraction patterns of  $\text{Ir}_{1-x}\text{V}_x\text{O}_2$  mixed metal oxide nanorods on a Si substrate for (a)  $\text{Ir}_{0.66}\text{V}_{0.34}\text{O}_2$  and (b)  $\text{Ir}_{0.40}\text{V}_{0.60}\text{O}_2$ , respectively.

**Fig. S4**

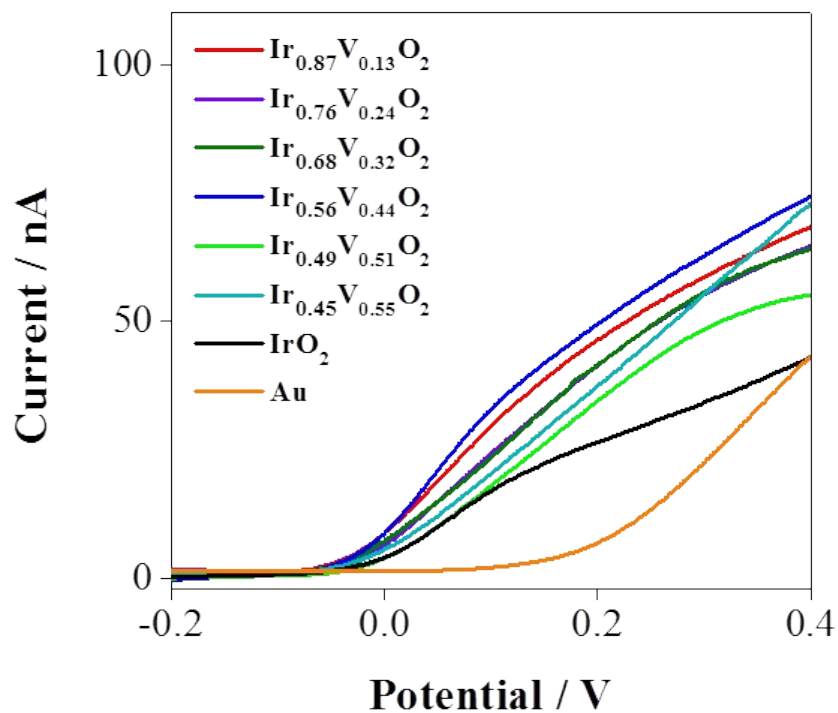

**Fig. S4** LSV waves at  $\text{Ir}_{1-x}\text{V}_x\text{O}_2$  nanorods on GC, iridium oxide (black) and Au microwire (orange) in 0.1 M  $\text{N}_2$ -purged PBS solution (pH 7.4) containing 0.5 mM AA with a scan rate of  $10 \text{ mV s}^{-1}$ .
